# Supplementary material for: Vertical transmission of Zika virus targeting the radial glial cells affects cortex development of offspring mice
Source: PubMed Central journal article supplement — Cell Res. 2016 May 13;26(6):645–54. doi: 10.1038/cr.2016.58 (PMC4897185; doi:10.1038/cr.2016.58), 2016-05-13
Supplement: cr201658x1.pdf [file cr201658x1.pdf]

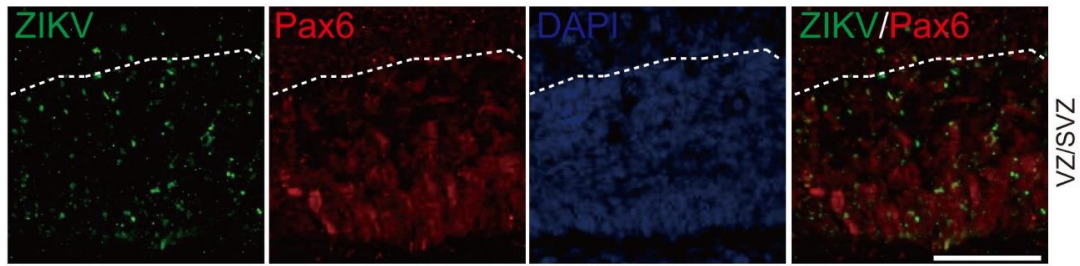

**Supplementary information, Figure S1** Immunostaining for radial glia marker Pax6 in brain slices from P1 mice i.p injected with ZIKV at E13.5. ZIKV was revealed by convalescent phase serum. Scale bar, 50  $\mu$ m.
